# Supplementary material
Source: MDPI journal article supplement (https://www.mdpi.com/2073-4395/12/12/3224)
Supplement: s1 [file s1]

**Table S1.** List of primers used in the present study.

| Primers           |   |                                    |
|-------------------|---|------------------------------------|
| <b>HsfA1aOE</b>   | F | 5'-TTGGCGCGCCATGGAGCCGAATTCTTAT3'  |
|                   | R | 50-GGGGTACCGATCATATGTTTTTGTTG      |
| <b>Sly-miR159</b> | F | 5' CGCAGTTTGGATTGAAGGGAG3'         |
|                   | R | 5' CAGGTCCAGTTTTTTTTTTTTTTTAGAG 3' |
| <b>SIHKT1</b>     | F | CCTAGAACCCTACCGTC                  |
|                   | R | GAACATTTGAGAAAACCTCC               |
| <b>Actin</b>      | F | 5' TGTCCCTATTTACGAGGGTTATGC 3'     |
|                   | R | 5' CAGTTAAATCACGACCAGCAAGAT 3'     |

**Supplementary file S1.** Sequence of bacterial isolate AGH3.

AGGGTTAGGCCACCGGCTTCAGGTGTTACCGACTTTCATGACTTGACGGGCGGTG  
TGTACAAGACCCGGGAACGTATTCACCGCAGCGTTGCTGATCTGCGATTACTAGC  
GACTCCGACTTCATGAGGTCGAGTTGCAGACCTCAATCCGAACTGGGACCGGCTT  
TTTGGGATTTCGCTCCACCTCGCGGTATTGCAGCCCTTTGTACCGGCCATTGTAGC  
ATGCGTGAAGCCCAAGACATAAGGGGCATGATGATTTGACGTCATCCCCACCTTC  
CTCCGAGTTGACCCCGGCAGTATCCCATGAGTTCCCACCATTACGTGCTGGCAAC  
ATAGAACGAGGGTTGCGCTCGTTGCGGGACTTAACCCAACATCTCACGACACGA  
GCTGACGACAACCATGCACCACCTGTTTACGAGTGTCCAAAGAGTTGACCATTTC  
TGGCCCGTTCTCGTATATGTCAAGCCTTGGTAAGGTTCTTCGCGTTGCATCGAATT  
AATCCGCATGCTCCGCCGCTTGTGCGGGTCCCCGTCAATTCCTTTGAGTTTTAGCC  
TTGCGGGCCGTACTCCCCAGGCGGGGAACCTTAATGCGTTAGCTGCGTCACGGAATC  
CGTGGAATGGACCCCACTAGTTCCCAACGTTTACGGGGTGGACTACCAGGG  
TATCTAAGCCTGTTTGCTCCCCACCCTTTCGCTCCTCAGCGTCAGTTACGGCCCAG  
AGATCTGCCTTCGCCATCGGTGTTCTCCTGATATCTGCGCATTCCACCGCTACAC  
CAGGAATTCCAATCTCCCCTACCGCACTCTAGTCTGCCCCGTACCCACTGCAGGCC  
GGAGGTTGAGCCTCCGGATTTACAGCAGACGCGACAAACCGCCTACGAGCTCT  
TTACGCCCAATAATTCCGGATAACGCTTGCGCCCTACGTATTACCGCGGCTGCTG  
GCACGTAGTTAGCCGGCGCTTTTTCTGCAGGTACCGTCACTTTCGCTTCTTCCCTG  
CTAAAAGAGGTTTACAACCCGAAGGCCGTCGTCCCTCACGCGGCGTTGCTGCATC  
AGGCTTGCGCCCATTGTGCAATATTCCCCACTGCTGCCTCCCGTAGGAGTCTGGG  
CCGTGTCTCAGTCCCAGTGTGGCCGGTCACCCTCTCAGGCCGGCTACCCGTCGAC  
GCCTTGGTGAGCCATTACCTCACCAACAAGCTGATAGGCCGCGAGCCCATCCCCA  
ACCGAAATTCTTTCCAGACGCAGACCATGCGGTCACGTCACATATCCAGTATTAG  
ACGCCGTTTCCAGCGCTTATCCCAGAGTCAGGGGCAGGTTGCTCACGTGTTACTC  
ACCCGTTTCGCCACTGATCCCACAGAGCAAGCTCCGTGTTCAACC

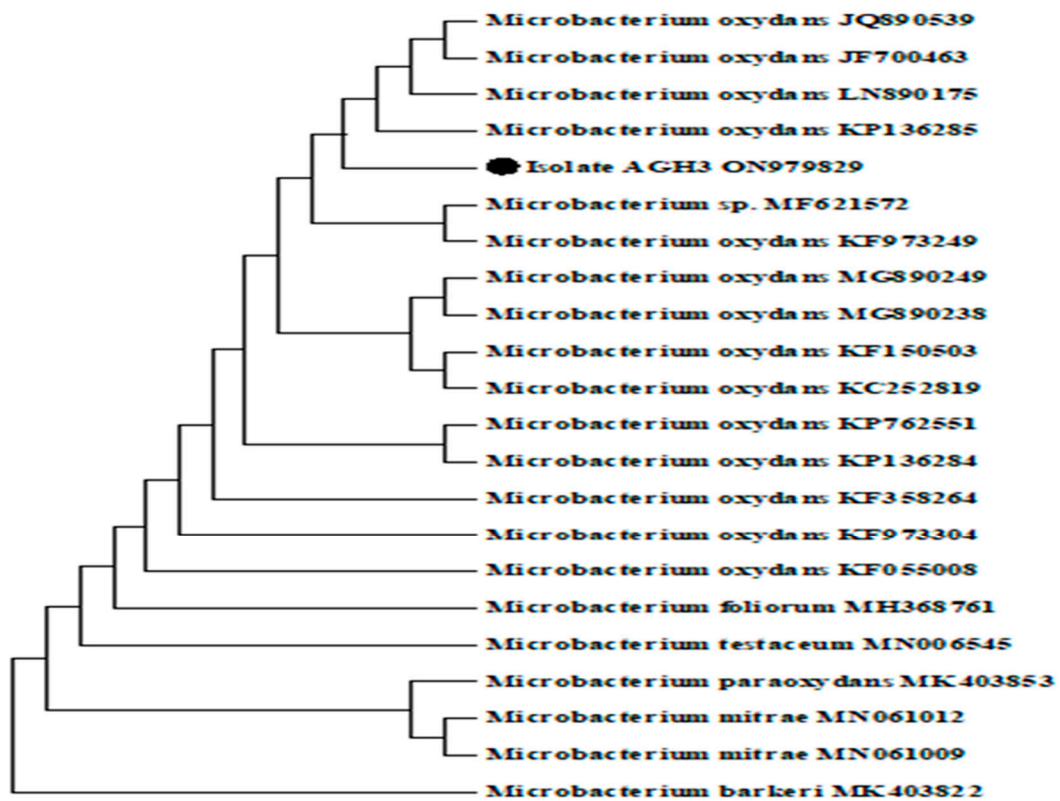

**Figure S1.** Phylogenetic analysis of multi-trait PGP AGH3. The homology of nucleotide sequences was compared using the BLAST search software. The 16S rRNA region were employed in the current investigation were obtained from NCBI and used to build the tree using the MEGA 6.0 software. The nodes in the phylogenetic tree were supported statistically by the bootstrap replications (1K).
